# Supplementary material for: Reductive amination of phenol over Pd-based catalysts: elucidating the role of the support and metal nanoparticle size
Source: Royal Society of Chemistry journal article supplement (doi:10.1039/d2re00259k), 2022-09-21
Supplement: d2re00259k1.pdf [file d2re00259k1.pdf]

## Supplementary Material

### Reductive amination of phenol over Pd-based catalysts: Elucidating the role of the support and metal cluster size

Maray Ortega<sup>a</sup>, David Gómez<sup>b</sup>, Raydel Manrique<sup>a</sup>, Guillermo Reyes<sup>c</sup>, Julieth Tatiana García-Sánchez<sup>d</sup>, Víctor Gabriel Baldovino Medrano<sup>d,e</sup>, Romel Jiménez<sup>b</sup>, Luis E. Arteaga-Pérez<sup>a,f\*</sup>

<sup>a</sup> Laboratory of Thermal and Catalytic Processes (LPTC), Wood Engineering Department, Faculty of Engineering, Universidad del Bio-Bio, Concepción, Chile. Email: [larteaga@ubiobio.cl](mailto:larteaga@ubiobio.cl) Twitter: @LptcUbb

<sup>b</sup> Carbon and Catalysis Laboratory (CarboCat), Department of Chemical Engineering, Universidad de Concepción, Concepción, Chile.

<sup>c</sup> Biobased Colloids and Materials, Department of Bioproducts and Biosystems, School of Chemical Engineering, Aalto University, FI-00076, Espoo, Finland.

<sup>d</sup> Centro de Investigaciones en Catálisis (CICAT), Universidad Industrial de Santander, Colombia

<sup>e</sup> Laboratorio Central de Ciencia de Superficies (SurfLab), Universidad Industrial de Santander, Colombia

<sup>f</sup> Universidad de Concepción, Unidad de Desarrollo Tecnológico, UDT, Coronel, Chile

#### Catalysts

##### Synthesis and pre-treatments

The synthesis of the catalysts was carried out by incipient wet impregnation using PdCl<sub>2</sub> (59%, Sigma Aldrich) as the Pd precursor, with the addition of triethanolamine (TEA, ≥ 99.0%, Merck) and hydrochloric acid (HCl (aq.) ≥ 37.0% Merck). The addition of triethanolamine (mol (TEA)/mol (Pd) = 4) allows the amino groups to act as a coordination site for metallic Pd. The Al<sub>2</sub>O<sub>3</sub> (CAS 44740-22) and SiO<sub>2</sub> (CAS 43855-30) were purchased from Alfa-Aesar (Chile) as pellets, thus they were dried at 100 °C for 24 h, crushed, and sieved to particle sizes <75 μm before use.

After impregnation, the catalyst's precursors were dried at 60 °C for 48 h in static air in a drying oven (Lab Tech, LDO-150F) and then calcined at 500 °C for 2 h (2 °C/min) in a muffle (Nabertherm). After calcination, the precursors were placed in a U-shaped reactor (18 mm ID) and treated under a constant flow of H<sub>2</sub> (99.999%, 40 mL/min) at 400 °C (2 h dwell time), using a heating rate of 2 °C/min. The metal loading (1 – 10%wt. Pd) over Al<sub>2</sub>O<sub>3</sub> and the heating ramp for reduction were varied for generating four different Pd cluster sizes (denoted as Pd/Al<sub>2</sub>O<sub>3</sub>-D1, Pd/Al<sub>2</sub>O<sub>3</sub>-D2, Pd/Al<sub>2</sub>O<sub>3</sub>-D3, and Pd/Al<sub>2</sub>O<sub>3</sub>-D4, here D1 to D4 indicates the increasing particle sizes).

##### Surface characterization by Pyridine FTIR

The nature of surface acid sites (Lewis or Brønsted) was inspected by infrared spectroscopic investigation of the pyridine (C<sub>5</sub>H<sub>5</sub>N, J.T. Baker, >99.9%) adsorption and desorption tests. Samples were pressed (2 tons, 1 min) on 13 mm discs (10 mg) and mounted inside a flow cell, equipped with ZnSe windows and a vacuum system (Pfeiffer Hicube Eco Turbo). The samples were outgassed at 10<sup>-4</sup> Pa and 450 °C (5 °C/min) for 10 hours. Then the spectrum of the outgassed samples was taken as a baseline, and the adsorption of pyridine was initiated at 150 °C for 30 min. Subsequently, desorption was carried out at 25, 140, 250, and 400 °C for 30 min each. The IR spectra corresponding to each of the desorption temperatures were collected with a Nicolet iS50 (ThermoScientific) using an MCT detector, 32 scans with a resolution of 4 cm<sup>-1</sup>. Pyridine adsorbed at Lewis (L-Py) and Brønsted (PyH<sup>+</sup>) acid sites exhibits bands at around 1445–1460 cm<sup>-1</sup> and 1540–1548 cm<sup>-1</sup>, respectively. The bands of hydrogen-bonded pyridine (hb-Py) are in similar ranges of 1440–1447 cm<sup>-1</sup> and 1590–1600 cm<sup>-1</sup>.

### Surface characterization by SEM-EDX

Scanning electron microscopy (SEM) measurements were recorded after the reduction of the precursors. This analysis was performed, in a Hitachi SU3500 microscope operated at an accelerating voltage of 20kV and coupled to a Bruker XFlash 610M energy-dispersive X-ray (EDX) accessory. Figure M3 shows the SEM micrograph and EDX signals of the Pd catalysts supported on C, SiO<sub>2</sub>, and Al<sub>2</sub>O<sub>3</sub>. The recorded images showed a uniform distribution of the metal particles along the surface of the three catalysts indicating that the anchoring of the metal during impregnation was successful.

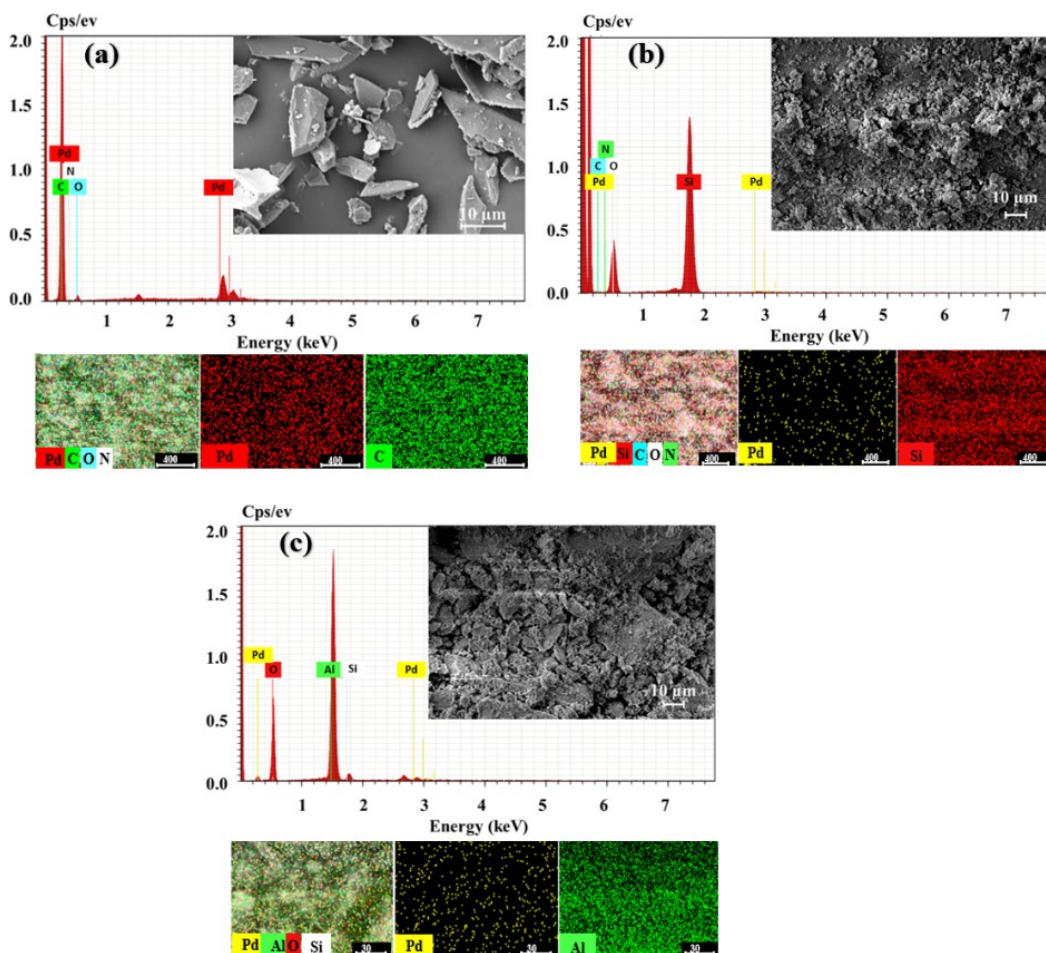

**Figure E1.** SEM-EDX characterization of the corresponding spatial distribution of (a) Pd/C, (b) Pd/SiO<sub>2</sub>, (c) Pd/Al<sub>2</sub>O<sub>3</sub> catalysts.

**Table E1.** Results from the chemical characterization of catalysts.

| Catalyst                              | Metal content by AAS* (nm) | Metal content by SEM-EDX (nm) |
|---------------------------------------|----------------------------|-------------------------------|
| Pd/C                                  | 9.37±0.6                   | 10.8±0.4                      |
| Pd/SiO <sub>2</sub>                   | 9.35±0.08                  | 8.7±0.07                      |
| Pd/Al <sub>2</sub> O <sub>3</sub> -D3 | 8.95±0.6                   | 10.1±0.07                     |
| Pd/Al <sub>2</sub> O <sub>3</sub> -D4 | 8.95±0.6                   | n.d.                          |
| Pd/Al <sub>2</sub> O <sub>3</sub> -D2 | 4.87±0.13                  | n.d.                          |
| Pd/Al <sub>2</sub> O <sub>3</sub> -D1 | 1.09±0.01                  | 1.08±0.07                     |

\* The composition by AAS was used for the estimation of TOF.

### Surface characterization by NH<sub>3</sub>-TPD

The bulk surface acidity of the Pd catalysts supported on C, SiO<sub>2</sub> and Al<sub>2</sub>O<sub>3</sub> were inspected by temperature-programmed desorption of ammonia (NH<sub>3</sub>-TPD). The experiments were carried out using the 3FLEX (Micromeritics) apparatus equipped with a TCD combined with a mass spectrometer (Cirrus 2, MKS Spectra Product). Before analysis, samples (~30 mg) were pre-treated 30 min under a He flow (50 mL/min) at 350 °C (10 °C/min) up to baseline stabilization. The adsorption of NH<sub>3</sub> was carried out at 100 °C for 15 min (30 mL/min). Once the surface was saturated, the weakly adsorbed NH<sub>3</sub> was removed by flowing He (100 mL/min) at 100 °C for 0.5 h. Subsequently, desorption was carried out using a linear heating rate of 10 °C/min from 100 to 550 °C. Products formed during the TPD-NH<sub>3</sub> treatment were identified by a mass spectrometer by following specific fragments, m/z 17, 18, 28 corresponding to the m/z of NH<sub>3</sub>, H<sub>2</sub>O, and N<sub>2</sub>, respectively. All desorption profiles were normalized per gram of catalyst (Figure M2), and the density of acid sites ( $\mu\text{mol}_{\text{NH}_3}/\text{m}^2_{\text{cat}}$ ) was obtained from the ponderation of total acidity by the surface area ( $\text{m}^2/\text{g}$ ). The strength of the acid sites was ascribed to the temperature-relative position of peaks (weak <250 °C, medium 250 – 450 °C, and strong >450 °C).

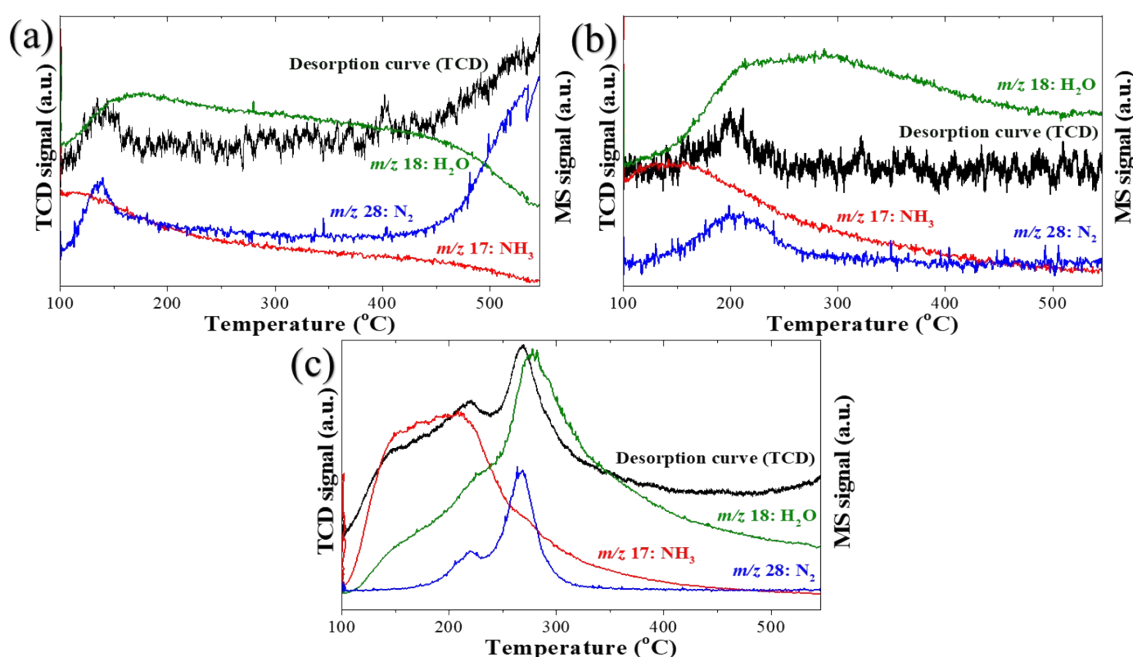

**Figure E2.** NH<sub>3</sub>-TPD profiles of the supported Pd catalysts: (a) Pd/C, (b) Pd/SiO<sub>2</sub> and (c) Pd/Al<sub>2</sub>O<sub>3</sub>-D3

### Experimental design

Prior to the activity test and kinetic measurements, the absence of mass transfer limitations is inspected. To guarantee that the catalytic activity tests are carried out under a regimen of kinetic control, the quantitative parameters of Mears and Weisz-Prater [11] were calculated and the mass balance closure was verified.

### Products identification and quantification

#### Identification

An aliquot of the reaction products (100  $\mu\text{L}$ ) obtained according to the previous procedure and stored at -40 °C, is transferred to amber GC Vials along with 500  $\mu\text{L}$  of solvent. Then these samples are analyzed by gas chromatography coupled to mass spectrometry for the identification of analytes. The analysis is performed in a Clarus 690 (Perkin Elmer) chromatograph equipped with a quadrupole mass detector (SQ8S, Perkin Elmer). The compounds are separated in an Elite 1701 column (30 m  $\times$  0.25 mm  $\times$  0.25  $\mu\text{m}$ ) by heating from 45 to 280 °C at 2.5 °C  $\text{min}^{-1}$ . The MS is operated at 70 eV, and a sweep of m/z between 30 and 600 Da is performed. The identification is done by comparing the ionization patterns of the identified species with the NIST mass spectra MS library using a Match cut-off above 85%.

The complete data of the compound's identification for the phenol amination with cyclohexylamine, and for the auto-condensation of the cyclohexylamine are provided in the files ESI-2.xls and ESI\_3.xls, respectively.

#### Quantification

The reaction mixtures are analyzed by ex-situ gas chromatography (GC) using n-nonane as internal standard. The samples are then analyzed by ex-situ gas chromatography in an SRI chromatograph (Model 8610) equipped with an on-column injection port, a flame ionization detector (FID) and a MTX-5 column (30 m X 0.25 mm X 0.1 μm). Retention time's assignment is done by injecting solvent-pure products samples prior to samples analysis.

**Table. E2.** Reaction conditions for phenol amination with cyclohexylamine. Solvent = tert Amyl Alcohol, and Pd/C (10 wt.%). Second section is referred to the conditions for the kinetic experiments.

| Run | Phenol Concentration (mol/L) | CyA (Eqv) | Catalyst                       | Run | Phenol Concentration (mol/L) | CyA (Eqv.) | Catalyst                              |
|-----|------------------------------|-----------|--------------------------------|-----|------------------------------|------------|---------------------------------------|
| 1   | 0.2                          | 1.4       | None                           | 7   | 0.2                          | 1.4        | Pd/C                                  |
| 2   | 0.2                          | 1.4       | Al <sub>2</sub> O <sub>3</sub> | 8   | 0.2                          | 1.4        | Pd/ SiO <sub>2</sub>                  |
| 3   | 0.2                          | 1.4       | C                              | 9   | 0.2                          | 1.4        | Pd/Al <sub>2</sub> O <sub>3</sub> -D1 |
| 4   | 0.2                          | 1.4       | SiO <sub>2</sub>               | 10  | 0.2                          | 1.4        | Pd/Al <sub>2</sub> O <sub>3</sub> -D2 |
| 5   | None                         | 1.4       | Pd/C                           | 11  | 0.2                          | 1.4        | Pd/Al <sub>2</sub> O <sub>3</sub> -D3 |
| 6   | 0.2                          | None      | Pd/C                           | 12  | 0.2                          | 1.4        | Pd/Al <sub>2</sub> O <sub>3</sub> -D4 |

#### Evaluation of mass transfer limitations

The Weisz-Prater criterion was used to rule out the influence of internal limitations while the Mear's criterion was applied to evaluate the importance of external mass transfer limitations.

$$\text{Weisz-Prater: } \Phi_{WP} = \frac{r_{obs} * R_p^2}{C_{s,i} * D_{eff}}$$

$$\text{Mears: } Cm = \frac{-r_{obs} * \rho_b * R_p * n}{k_c * C_s}$$

Here  $r_{obs}$  is the initial reaction rate,  $R_p$  is the mean radius of the catalyst particle,  $D_{eff}$  is de effective diffusivity of the reactant in the solvent, and  $C_s$  is the substrate concentration.

The initial rates ( $r_{obs}^0$ , mol<sub>i</sub>/L min) were calculated by polynomial regression, and differentiation of the  $C_i$  vs time curves extrapolated to zero-time for conversion below 20%.

$$r_i^0 = \left[ \left( \frac{dC_i}{dt} \right) \right]_{t=0}$$

**Table E3.** Application of the Mears's criterion to the reaction system. calculated from the initial reaction rate at agitation rates of 900 rpm on Pd/C, Pd/SiO<sub>2</sub> and Pd/Al<sub>2</sub>O<sub>3</sub> catalysts. **Reaction conditions:** T = 140 °C, P<sub>H2</sub>= 1.5 bar, C<sup>0</sup>PhOH = 0.2 mol/L, m<sub>cat</sub> (Pd/C; Pd/SiO<sub>2</sub>; Pd/Al<sub>2</sub>O<sub>3</sub>) = 0.3 g, VR = 15 mL.

| Catalysts                                  | Parameter                                      | Phenol                      | Cyclohexylamine             |
|--------------------------------------------|------------------------------------------------|-----------------------------|-----------------------------|
| <b>General</b>                             | <i>Re</i>                                      | 81818.2                     | 81818.2                     |
|                                            | <i>Sc</i>                                      | 144.3                       | 544.8                       |
|                                            | <i>Sh</i>                                      | 658.5                       | 1019.8                      |
| <i>Pd/C</i>                                | <i>k<sub>c</sub> (m/s)</i>                     | 0.0335                      | 0.0137                      |
|                                            | <i>ρ<sub>b</sub> (g/cm<sup>3</sup>)</i>        | 0.225                       | 0.225                       |
|                                            | <i>R<sub>p</sub> (m)</i>                       | 0.000050                    | 0.000050                    |
|                                            | <i>r<sub>obs</sub> (mol/s g<sub>cat</sub>)</i> | 7.92*10 <sup>-7</sup>       | 7.92*10 <sup>-7</sup>       |
|                                            | <b><i>Cm</i></b>                               | <b>2.54*10<sup>-6</sup></b> | <b>6.19*10<sup>-6</sup></b> |
| <i>Pd/SiO<sub>2</sub></i>                  | <i>k<sub>c</sub> (m/s)</i>                     | 0,0096                      | 0,0039                      |
|                                            | <i>ρ<sub>b</sub> (g/cm<sup>3</sup>)</i>        | 0.140                       | 0.140                       |
|                                            | <i>R<sub>p</sub> (m)</i>                       | 0.000175                    | 0.000175                    |
|                                            | <i>r<sub>obs</sub> (mol/s g<sub>cat</sub>)</i> | 1.63*10 <sup>-7</sup>       | 3.26*10 <sup>-7</sup>       |
|                                            | <b><i>Cm</i></b>                               | <b>3.98*10<sup>-6</sup></b> | <b>1.94*10<sup>-5</sup></b> |
| <i>Pd/Al<sub>2</sub>O<sub>3</sub> – D3</i> | <i>k<sub>c</sub> (m/s)</i>                     | 0,0096                      | 0,0039                      |
|                                            | <i>ρ<sub>b</sub> (g/cm<sup>3</sup>)</i>        | 0.310                       | 0.310                       |
|                                            | <i>R<sub>p</sub> (m)</i>                       | 0.000175                    | 0.000175                    |
|                                            | <i>r<sub>obs</sub> (mol/s g<sub>cat</sub>)</i> | 9.01*10 <sup>-7</sup>       | 1.22*10 <sup>-6</sup>       |
|                                            | <b><i>Cm</i></b>                               | <b>4.86*10<sup>-5</sup></b> | <b>1.61*10<sup>-4</sup></b> |

**Table E4.** Application of the Weisz-Prater criterion to the reaction system, calculated from the initial reaction rate on Pd/C, Pd/SiO<sub>2</sub> and Pd/Al<sub>2</sub>O<sub>3</sub> catalysts. **Reaction conditions:** T = 140 °C, P<sub>H2</sub>= 1.5 bar, C<sup>0</sup>PhOH = 0.2 mol/L, m<sub>cat</sub> (Pd/C; Pd/SiO<sub>2</sub>; Pd/Al<sub>2</sub>O<sub>3</sub>) = 0.3 g, VR = 15 mL, agitation rates = 900 rpm.

| Catalysts                                  | Parameter                                     | Phenol                | Cyclohexylamine        |
|--------------------------------------------|-----------------------------------------------|-----------------------|------------------------|
| <i>Pd/C</i>                                | <i>λ</i>                                      | 0,232                 | 0.245                  |
|                                            | <i>D<sub>eff</sub> (cm<sup>2</sup>/s)</i>     | 9.87*10 <sup>-6</sup> | 1.54*10 <sup>-6</sup>  |
|                                            | <i>r<sub>obs</sub> (mol/s cm<sup>3</sup>)</i> | 1.78*10 <sup>-7</sup> | 1.78*10 <sup>-7</sup>  |
|                                            | <b><i>φ<sub>WP</sub></i></b>                  | <b>0.0022</b>         | <b>0.0138</b>          |
| <i>Pd/SiO<sub>2</sub></i>                  | <i>λ</i>                                      | 0.040                 | 0.042                  |
|                                            | <i>D<sub>eff</sub> (cm<sup>2</sup>/s)</i>     | 4.48*10 <sup>-5</sup> | 7.35*10 <sup>-6</sup>  |
|                                            | <i>r<sub>obs</sub> (mol/s cm<sup>3</sup>)</i> | 2.28*10 <sup>-8</sup> | 4.56*10 <sup>-8</sup>  |
|                                            | <b><i>φ<sub>WP</sub></i></b>                  | <b>0.0007</b>         | <b>0.0090</b>          |
| <i>Pd/Al<sub>2</sub>O<sub>3</sub> – D3</i> | <i>λ</i>                                      | 0.060                 | 0.064                  |
|                                            | <i>D<sub>eff</sub> (cm<sup>2</sup>/s)</i>     | 3.57*10 <sup>-5</sup> | 5..80*10 <sup>-6</sup> |
|                                            | <i>r<sub>obs</sub> (mol/s cm<sup>3</sup>)</i> | 2.79*10 <sup>-7</sup> | 3.78*10 <sup>-7</sup>  |

---

 $\phi_{WP}$ **0.0114****0.0950**

---
