# Supplementary material for: Reductive amination of phenol over Pd-based catalysts: elucidating the role of the support and metal nanoparticle size
Source: Royal Society of Chemistry journal article supplement (doi:10.1039/d2re00259k), 2022-09-21
Supplement: d2re00259k2.xlsx [file d2re00259k2.xlsx]

## Sheet: nonane (6.53)
tret	6.513	Nonane
Area	54542200	Formula: C9H20
%Area	0.543048	MW: 128 Exact Mass: 128.156501 CAS#: 111-84-2 NIST#: 228006 ID#: 8228 DB: mainlib
		Other DBs: Fine, TSCA, RTECS, HODOC, NIH, EINECS, IRDB
		Contributor: Japan AIST/NIMC Database- Spectrum MS-NW-3673
		InChIKey: BKIMMITUMNQMOS-UHFFFAOYSA-N Non-stereo
		10 largest peaks:
			43	999 |	57	761 |	41	305 |	85	259 |	71	223 |
			29	206 |	56	170 |	70	123 |	42	120 |	27	119 |

## Sheet: CyA (7.24 min)
tret	7.315	Cyclohexylamine
Area	658603328	Formula: C6H13N
		MW: 99 Exact Mass: 99.1047993 CAS#: 108-91-8 NIST#: 125147 ID#: 23891 DB: mainlib
		Other DBs: Fine, TSCA, RTECS, EPA, HODOC, EINECS, IRDB
		Contributor: NIST Mass Spectrometry Data Center, 1992
		Related CAS#: 143247-75-0; 157973-60-9
		InChIKey: PAFZNILMFXTMIY-UHFFFAOYSA-N Non-stereo
		10 largest peaks:
			56	999 |	43	306 |	28	160 |	99	123 |	30	113 |
			42	95 |	27	84 |	70	84 |	39	72 |	41	70 |

## Sheet: CyO (11.75 min)
tret	11.747	Cyclohexanone
Area	120394456	Formula: C6H10O
		MW: 98 Exact Mass: 98.073165 CAS#: 108-94-1 NIST#: 227787 ID#: 5581 DB: replib
		Other DBs: Fine, TSCA, RTECS, EPA, HODOC, NIH, EINECS, IRDB
		Contributor: Japan AIST/NIMC Database- Spectrum MS-NW-5501
		InChIKey: JHIVVAPYMSGYDF-UHFFFAOYSA-N Non-stereo
		10 largest peaks:
			55	999 |	42	574 |	98	461 |	41	311 |	69	249 |
			70	199 |	39	179 |	27	171 |	43	111 |	56	94 |

## Sheet: Aniline (19.65)
tret	19.65	Aniline
Area	27809168	Formula: C6H7N
		MW: 93 Exact Mass: 93.0578494 CAS#: 62-53-3 NIST#: 379437 ID#: 16180 DB: replib
		Other DBs: Fine, TSCA, RTECS, EPA, HODOC, EINECS, IRDB
		Contributor: Drug Lab
		Related CAS#: 146997-94-6; 37342-16-8
		InChIKey: PAYRUJLWNCNPSJ-UHFFFAOYSA-N Non-stereo
		10 largest peaks:
			93	999 |	66	422 |	65	232 |	92	130 |	52	68 |
			94	67 |	40	64 |	63	64 |	41	58 |	51	58 |

## Sheet: PhOHxy (20.65)
Name: 2-Cyclohexen-1-ol
Formula: C6H10O
MW: 98 Exact Mass: 98.073165 CAS#: 822-67-3 NIST#: 125103 ID#: 40617 DB: mainlib
Other DBs: Fine, HODOC, NIH, EINECS, IRDB
Contributor: NIST Mass Spectrometry Data Center, 1992
InChIKey: PQANGXXSEABURG-UHFFFAOYSA-N Non-stereo
10 largest peaks:
	70	999 |	83	471 |	39	413 |	55	369 |	41	352 |
	69	346 |	97	342 |	98	316 |	27	290 |	42	266 |

## Sheet: PhOH (26.06 min)
tret	26.185	Phenol
Area	534631744	Formula: C6H6O
		MW: 94 Exact Mass: 94.041865 CAS#: 108-95-2 NIST#: 133909 ID#: 73738 DB: mainlib
		Other DBs: Fine, TSCA, RTECS, EPA, USP, HODOC, NIH, EINECS, IRDB
		Contributor: NIST Mass Spectrometry Data Center, 1994
		Related CAS#: 14534-23-7; 50356-25-7; 8002-07-1
		InChIKey: ISWSIDIOOBJBQZ-UHFFFAOYSA-N Non-stereo
		10 largest peaks:
			94	999 |	66	387 |	65	266 |	39	243 |	40	114 |
			38	92 |	55	79 |	63	71 |	95	68 |	50	63 |

## Sheet: DCyA (39.82 min)
tret	39.64	Cyclohexanamine, N-cyclohexyl-
Area	5921377280	Formula: C12H23N
		MW: 181 Exact Mass: 181.18305 CAS#: 101-83-7 NIST#: 424164 ID#: 25520 DB: replib
		Other DBs: Fine, TSCA, RTECS, HODOC, NIH, EINECS
		Contributor: TAJIMA S, GUNMA COLLEGE OF TECHNOLOGY; Used with permission, courtesy of Funatsu Laboratory, University of Tokyo.The copyright reserved by Funatsu Laboratory.
		Related CAS#: 111487-88-8; 157973-63-2; 111522-94-2; 856793-27-6; 111487-93-5
		InChIKey: XBPCUCUWBYBCDP-UHFFFAOYSA-N Non-stereo
		10 largest peaks:
			138	999 |	56	441 |	41	148 |	55	146 |	181	116 |
			139	103 |	44	94 |	82	79 |	100	53 |	28	52 |

## Sheet: Imine (41.09 min)
tret	41.082	Cyclohexanamine, N-cyclohexylidene-
Area	103486920	Formula: C12H21N
		MW: 179 Exact Mass: 179.167399 CAS#: 10468-40-3 NIST#: 149265 ID#: 77908 DB: mainlib
		Other DBs: None
		Contributor: Chemical Concepts
		InChIKey: QAFRYXRYDOBFEF-UHFFFAOYSA-N Non-stereo
		10 largest peaks:
			98	999 |	55	680 |	41	614 |	136	483 |	56	456 |
			54	405 |	179	335 |	83	308 |	69	237 |	27	209 |

## Sheet: CyPhA (44.40 min)
tret	44.399	N-Phenylcyclohexylamine
Area	2098931200	Formula: C12H17N
		MW: 175 Exact Mass: 175.1361 CAS#: 1821-36-9 NIST#: 270961 ID#: 127751 DB: mainlib
		Other DBs: Fine, TSCA, HODOC, NIH, EINECS
		Contributor: A.A.Kutin, Moscow, Russia
		InChIKey: TXTHKGMZDDTZFD-UHFFFAOYSA-N Non-stereo
		10 largest peaks:
			132	999 |	175	283 |	118	177 |	93	143 |	77	139 |
			119	126 |	133	115 |	41	93 |	106	93 |	117	87 |
