# Supplementary material for: Reductive amination of phenol over Pd-based catalysts: elucidating the role of the support and metal nanoparticle size
Source: Royal Society of Chemistry journal article supplement (doi:10.1039/d2re00259k), 2022-09-21
Supplement: d2re00259k3.xlsx [file d2re00259k3.xlsx]

## Sheet: nonane (6.22)
t ret	6.215	Nonane
Area	1918474496	Formula: C9H20
		MW: 128 Exact Mass: 128.156501 CAS#: 111-84-2 NIST#: 228006 ID#: 8228 DB: mainlib
		Other DBs: Fine, TSCA, RTECS, HODOC, NIH, EINECS, IRDB
		Contributor: Japan AIST/NIMC Database- Spectrum MS-NW-3673
		InChIKey: BKIMMITUMNQMOS-UHFFFAOYSA-N Non-stereo
		10 largest peaks:
			43	999 |	57	761 |	41	305 |	85	259 |	71	223 |
			29	206 |	56	170 |	70	123 |	42	120 |	27	119 |

## Sheet: CyA (7.15 min)
tret	7.15	Cyclohexylamine
Area	8622051	Formula: C6H13N
		MW: 99 Exact Mass: 99.1047993 CAS#: 108-91-8 NIST#: 125147 ID#: 23891 DB: mainlib
		Other DBs: Fine, TSCA, RTECS, EPA, HODOC, EINECS, IRDB
		Contributor: NIST Mass Spectrometry Data Center, 1992
		Related CAS#: 143247-75-0; 157973-60-9
		InChIKey: PAFZNILMFXTMIY-UHFFFAOYSA-N Non-stereo
		10 largest peaks:
			56	999 |	43	306 |	28	160 |	99	123 |	30	113 |
			42	95 |	27	84 |	70	84 |	39	72 |	41	70 |

## Sheet: DCyA (39.66 min)
t ret	39.66	Cyclohexanamine, N-cyclohexyl-
Area	106565144	Formula: C12H23N
		MW: 181 Exact Mass: 181.18305 CAS#: 101-83-7 NIST#: 290817 ID#: 136439 DB: mainlib
		Other DBs: Fine, TSCA, RTECS, HODOC, NIH, EINECS
		Contributor: NIST Mass Spectrometry Data Center, 1998.
		Related CAS#: 111487-88-8; 157973-63-2; 111522-94-2; 856793-27-6; 111487-93-5
		InChIKey: XBPCUCUWBYBCDP-UHFFFAOYSA-N Non-stereo
		10 largest peaks:
			138	999 |	56	441 |	41	148 |	55	146 |	181	116 |
			139	103 |	44	94 |	82	79 |	100	53 |	28	52 |

## Sheet: CyPhA (43.97 min)
t ret	43.969	N-Phenylcyclohexylamine
Area	2353546496	Formula: C12H17N
		MW: 175 Exact Mass: 175.1361 CAS#: 1821-36-9 NIST#: 446867 ID#: 24419 DB: replib
		Other DBs: Fine, TSCA, HODOC, NIH, EINECS
		Contributor: NIST Mass Spectrometry Data Center
		InChIKey: TXTHKGMZDDTZFD-UHFFFAOYSA-N Non-stereo
		10 largest peaks:
			132	999 |	175	283 |	118	177 |	93	143 |	77	139 |
			119	126 |	133	115 |	41	93 |	106	93 |	117	87 |

## Sheet: DPhA (45.36 min)
t ret	45.367	Diphenylamine
Area	1268250112	Formula: C12H11N
Unknown.png		MW: 169 Exact Mass: 169.089149 CAS#: 122-39-4 NIST#: 229169 ID#: 30061 DB: replib
		Other DBs: Fine, TSCA, RTECS, EPA, HODOC, NIH, EINECS, IRDB
		Contributor: Japan AIST/NIMC Database- Spectrum MS-NW- 485
		InChIKey: DMBHHRLKUKUOEG-UHFFFAOYSA-N Non-stereo
		10 largest peaks:
